# Supplementary material for: Direct synthesis of porous graphitic carbon sheets grafted on carbon fibers for high-performance supercapacitors
Source: Royal Society of Chemistry journal article supplement (doi:10.1039/c8ta11844b), 2019-01-01
Supplement: c8ta11844b1.pdf [file c8ta11844b1.pdf]

## Supplementary information

### Direct synthesis of porous graphitic carbon sheets grafted on carbon fiber for high-performance supercapacitors

Xiaohua Zhang, Hengxiang Li, Bing Qin, Qun Wang, Xiaohan Xing, Donghua Yang, Li'e Jin, Qing Cao\*

Institute of Chemistry and Chemical Engineering, Taiyuan University of Technology, 030024 P.R.China.

\*E-mail address: qcqao2000@163.com (Q Cao)

#### Content:

**Fig. S1** Galvanostatic charge–discharge curves of CS@CF-KFe symmetric supercapacitor at different current densities in 6 M KOH electrolyte.

**Fig. S2** Galvanostatic charge–discharge curves of CS@CF-KFe symmetric supercapacitor at different current densities in 1 M Na<sub>2</sub>SO<sub>4</sub> electrolyte.

**Table S1** Comparison of electrochemical properties of CS@CF-KFe with reported various biomass-derived carbon materials in the references.

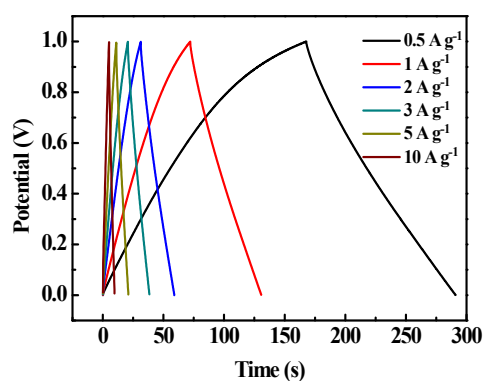

**Fig. S1** Galvanostatic charge–discharge curves of CS@CF-KFe symmetric supercapacitor at different current densities in 6 M KOH electrolyte.

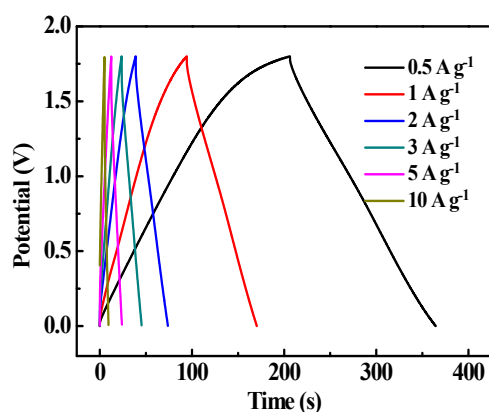

**Fig. S2** Galvanostatic charge–discharge curves of CS@CF-KFe symmetric supercapacitor at different current densities in 1 M Na<sub>2</sub>SO<sub>4</sub> electrolyte.

**Table S1** Comparison of electrochemical properties of CS@CF-KFe with reported various biomass-derived carbon materials in the references.

| Precursor                    | Catalyst                                                                               | $S_{\text{BET}}$<br>(m <sup>2</sup> g <sup>-1</sup> ) | $T^{\text{a}}$<br>(A g <sup>-1</sup> ) | $C^{\text{b}}$<br>(F g <sup>-1</sup> ) | Cycling stability     | Ref.         |
|------------------------------|----------------------------------------------------------------------------------------|-------------------------------------------------------|----------------------------------------|----------------------------------------|-----------------------|--------------|
| Cornstalk                    | K <sub>4</sub> [Fe(CN) <sub>6</sub> ]                                                  | 540                                                   | 1                                      | 213                                    | 98% after 6000        | [1]          |
| Glucose                      | KOH                                                                                    | 1880                                                  | 0.25                                   | 283                                    | 88.5% after<br>10000  | [2]          |
| Willow catkin                | KOH                                                                                    | 1533                                                  | 0.5                                    | 298                                    | 98% after 1000        | [3]          |
| Camellia petals              | (NH <sub>4</sub> ) <sub>2</sub> S <sub>2</sub> O <sub>8</sub>                          | 1122                                                  | 0.5                                    | 275                                    | 98% after 1000        | [4]          |
| Pectin biopolymer            | Mg(CH <sub>3</sub> COO) <sub>2</sub><br>·4H <sub>2</sub> O                             | 1320                                                  | 1                                      | 274                                    | ---                   | [5]          |
| Bagasse                      | KOH                                                                                    | 2296                                                  | 0.5                                    | 320                                    | 92.85% after<br>15000 | [6]          |
| Nori                         | ZnCl <sub>2</sub>                                                                      | 832.4                                                 | 0.1                                    | 220                                    | 96.6% after 5000      | [7]          |
| Glucose                      | KOH                                                                                    | 1997.5                                                | 0.5                                    | 312                                    | 91.3% after 4000      | [8]          |
| Pomelo mesocarps             | CaCl <sub>2</sub>                                                                      | 974.6                                                 | 0.5                                    | 245                                    | ---                   | [9]          |
| Filter papers and<br>glucose | K <sub>3</sub> [Fe(C <sub>2</sub> O <sub>4</sub> ) <sub>3</sub> ]<br>·H <sub>2</sub> O | 1515.6                                                | 1                                      | 313.0                                  | 100.2% after<br>10000 | This<br>work |

Note: <sup>a</sup> Current density; <sup>b</sup> Specific capacitance in KOH electrolyte using a three-electrode system.

## References

1. L. Wang, G. Mu, C. Tian, L. Sun, W. Zhou, P. Yu, J. Yin and H. Fu, *ChemSusChem*, 2013, **6**, 880-889.
2. D. Jia, X. Yu, H. Tan, X. Li, F. Han, L. Li and H. Liu, *J. Mater. Chem. A*, 2017, **5**, 1516-1525.
3. Y. Li, G. Wang, T. Wei, Z. Fan and P. Yan, *Nano Energy*, 2016, **19**, 165-175.
4. T. Wei, X. Wei, L. Yang, H. Xiao, Y. Gao and H. Li, *J. Power Sources*, 2016, **331**, 373-381.
5. F. Ma, D. Ma, G. Wu, W. Geng, J. Shao, S. Song, J. Wan and J. Qiu, *Chem. Commun.*, 2016, **52**, 6673-6676.
6. H. Feng, H. Hu, H. Dong, Y. Xiao, Y. Cai, B. Lei, Y. Liu and M. Zheng, *J. Power Sources*, 2016, **302**, 164-173.
7. C. Wang and T. Liu, *J. Alloys Compd.*, 2017, **696**, 42-50.
8. Y. Wang, H. Xuan, G. Lin, F. Wang, Z. Chen and X. Dong, *J. Power Sources*, 2016, **319**, 262-270.
9. H. Peng, G. Ma, K. Sun, Z. Zhang, Q. Yang and Z. Lei, *Electrochim. Acta*, 2016, **190**, 862-871.
